# Supplementary material
Source: PubMed Central journal article supplement (PMC7826392)
Supplement: pnas.2017231118.sapp.pdf [file pnas.2017231118.sapp.pdf]

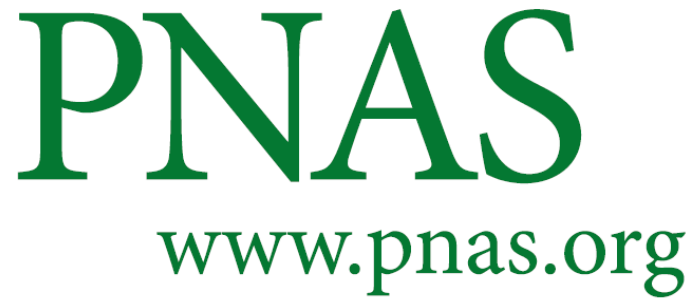

## **Supplementary Information for**

### **Garnet sand reveals rock recycling processes in the youngest exhumed (U)HP terrane on Earth**

Suzanne L. Baldwin, Jan Schönig, Joseph P. Gonzalez, Hugh Davies, Hilmar von Eynatten

Suzanne L. Baldwin  
Email: [sbaldwin@syr.edu](mailto:sbaldwin@syr.edu)

#### **This PDF file includes:**

Legends for Datasets S1 to S4

#### **Supplementary Information Text**

Dataset S1. Detrital garnet compositions and their inclusion suites.

Dataset S2: Garnet compositions from basement rocks and their inclusion suites. Samples are from the catchment area of the placer deposit, southern Goodenough Island.

Dataset S3: Compilation of garnet compositions for D'Entrecasteaux Islands basement rocks.

Dataset S4: Quartz-in-garnet and zircon-in-garnet elastic thermobarometric data for detrital garnets.
